# Supplementary material
Source: ML conference proceedings conference paper supplement (https://openaccess.thecvf.com/content/WACV2025/html/Mishra_USWformer_Efficient_Sparse_WACV_2025_paper.html)
Supplement: Supplementary file 1 [file Mishra_USWformer_Efficient_Sparse_WACV_2025_supplemental.pdf]

# USWformer: Efficient Sparse Wavelet Transformer for Underwater Image Enhancement

Supplementary Material

## Overview of Supplementary Material

The supplementary material includes:

**Sec. 1. Detailed Explanation of Loss Functions**

**Sec. 2. More Qualitative Results on Various Underwater Image Enhancement Datasets**

### 1. Detailed Explanation of Loss Functions

#### Training Losses

The total loss function,  $L_T$  used for the network training is defined as:

$$L_T = \lambda_1 L_1 + \lambda_2 L_2 + \lambda_3 L_3 + \lambda_4 L_4 \quad (1)$$

Where,  $\lambda_{1,2,3,4} \in (2, 3, 1, 2.5)$  are set empirically. The components of the loss functions include Perceptual loss ( $L_1$ ), Charbonnier loss ( $L_2$ ), Multi-Scale Structural Similarity Index (MS-SSIM) loss ( $L_3$ ), and Gradient loss ( $L_4$ ).

#### Perceptual Loss ( $L_1$ ):

Perceptual loss measures the perceptual similarity between generated and target images by utilizing feature representations from a pre-trained neural network. This approach has been shown to improve the quality of generated images across various image-generation tasks. Let  $O$  represent the target image and  $G_t$  represent the generated image. Using a pre-trained VGG19 [2] network ( $\phi_i$ ) we extract feature maps at different layers. The perceptual loss,  $L_1$ , is calculated as the difference between the feature maps of the target and generated images:

$$L_1 = \sum_{i=1}^{N=4} \|\phi_i(O) - \phi_i(G_t)\|_2^2 \quad (2)$$

Here,  $\phi_i$  represents the feature extraction function at layer  $i$  of the CNN, and ( $N = 4$ ) is the total number of layers considered for perceptual loss calculation.

#### Charbonnier loss ( $L_2$ ):

Training the network with MSE loss often results in blurry reconstructions because it maximizes the log-likelihood of a Gaussian distribution. To address this issue, we chose the Charbonnier loss, a differentiable version of the  $L_1$  norm. The Charbonnier loss is computed between the restored images ( $O$ ) and their corresponding ground-truth images ( $G_t$ ), and it is defined as follows:

$$L_2 = \mathbb{E}_{O \sim Q(O), G_t \sim Q(G_t)} \sqrt{(O - G_t)^2 + \epsilon} \quad (3)$$

where,  $Q(O)$  and  $Q(G_t)$  are the distributions of the restored image ( $O$ ) and the ground-truth image ( $G_t$ ), respectively. Additionally, the value of  $\epsilon$  is empirically set to  $1 \times 10^{-3}$ .

### MS-SSIM loss ( $L_3$ ):

The Structural Similarity (SSIM) loss primarily addresses a single input resolution. In contrast, the Multi-Scale SSIM (MS-SSIM) loss provides greater flexibility by taking into account different input resolutions.

$$L_3 = 1 - (MSSSIM(O, G_t)) \quad (4)$$

### Gradient loss ( $L_4$ ):

Generally, the Charbonnier loss prioritizes low-frequency components. However, when training the network to incorporate high-frequency details, the gradient loss becomes crucial. This second-order loss function enhances the sharpness of edges in the output [1]. Here,  $\hat{G}_O$  and  $\hat{G}_{G_t}$  represent the distributions of  $Q(O)$  and  $Q(G_t)$  respectively.

$$L_4 = \mathbb{E}_{\hat{G}_O \sim Q(O), \hat{G}_{G_t} \sim Q(G_t)} \left\| \hat{G}_{G_t} - \hat{G}_O \right\|_1 \quad (5)$$

## 2. More Qualitative Results on Various Underwater Image Enhancement Datasets

Please see Figure S 1, 2 for more qualitative results on various underwater datasets.

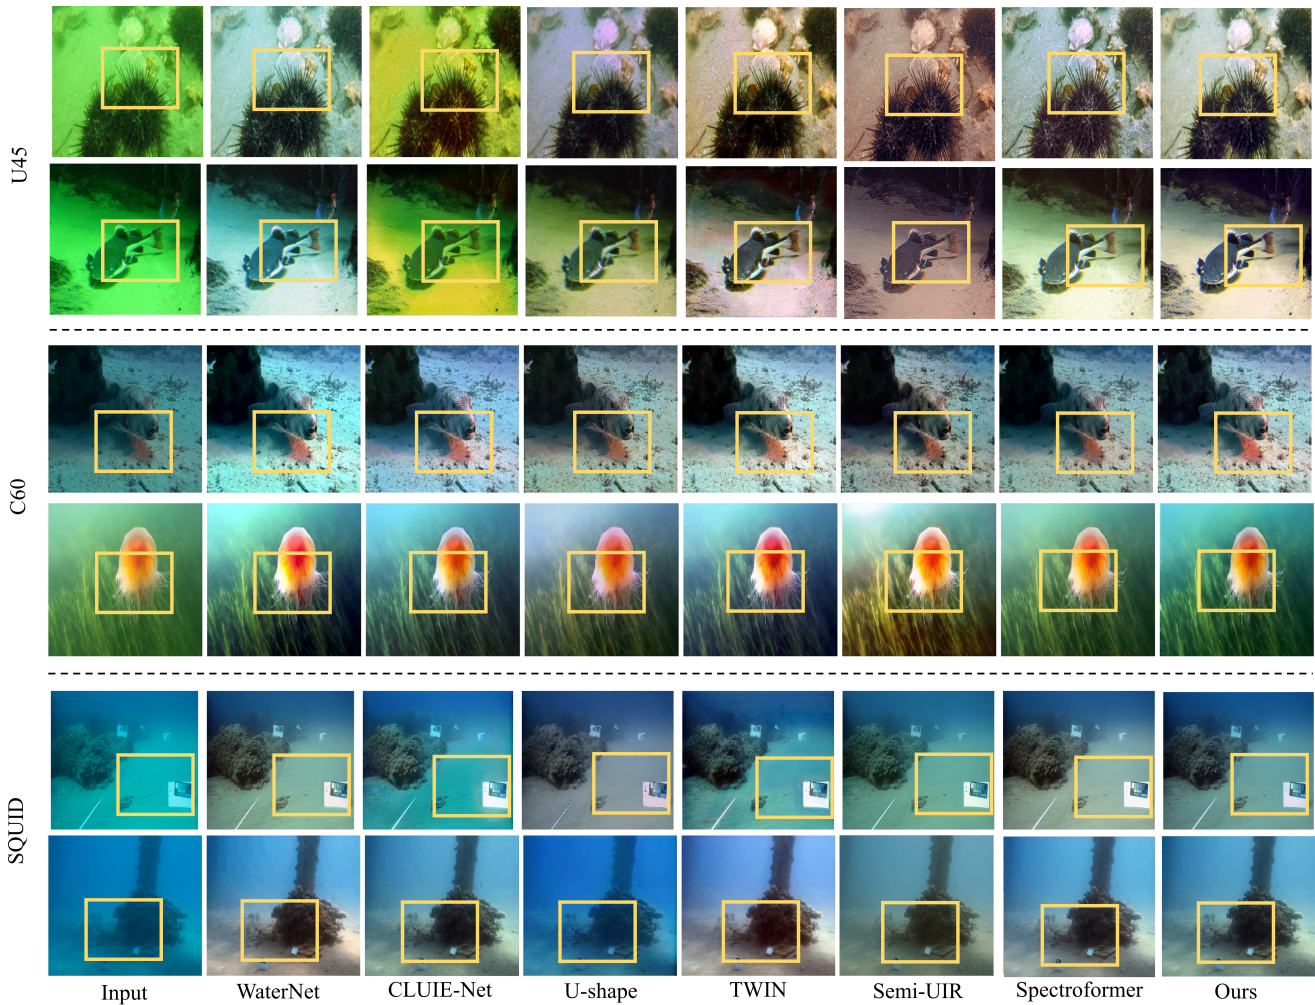

Figure S 1. Visual results on real-world datasets.

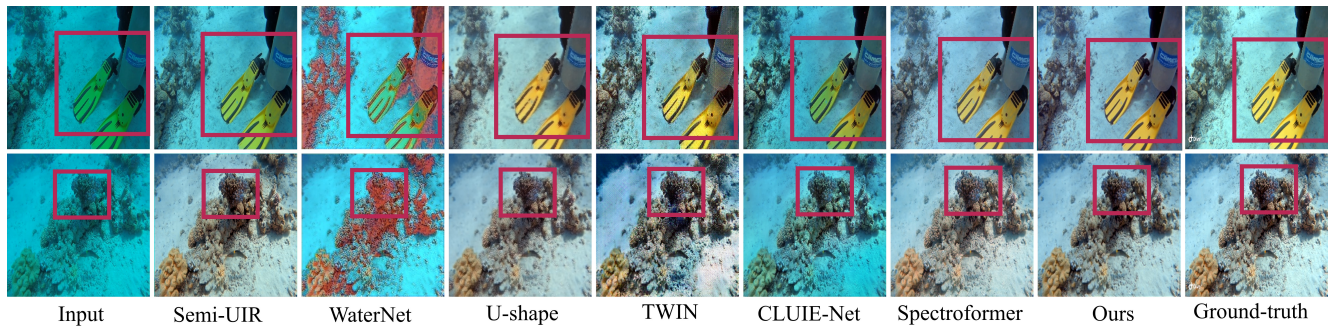

Figure S 2. Visual results on synthetic UIEB dataset.

## References

- [1] Michael Mathieu, Camille Couprie, and Yann LeCun. Deep multi-scale video prediction beyond mean square error. *arXiv preprint arXiv:1511.05440*, 2015. 2
- [2] Karen Simonyan and Andrew Zisserman. Very deep convolutional networks for large-scale image recognition. *arXiv preprint arXiv:1409.1556*, 2014. 1
